# Supplementary material for: Identification of pathogen genomic variants through an integrated pipeline
Source: Springer Nature journal article supplement (doi:10.1186/1471-2105-15-63), 2014-03-03
Supplement: 12859_2013_6324_MOESM1_ESM.pdf [file 12859_2013_6324_MOESM1_ESM.pdf]

Data 1 – PCR products of amplification across potential recombination events

>R1a2\_01\_08

ctaataatcatgaaagtaggtccacagagacctaataatgtatgtcctaataatgtaggtaatatagatcttagattaactaatataggtcttaagtaactaatataggtccaaagatacctaataatgtaggtcctaataatgtaggtaatataggtcgt  
aagatcatgaaagtaggtccagagatacctaataatgtacgtcctaataatgtaggtaatataggtccttaggttaagcaatataggtcctaagatcatgaaagtaggtccagagatacctaataatgtaggtcctaataatgtaggtaatataggtc  
taagaaactaacctaggtcttaaggttaactaatataggtcctaataaactaacctaggtccttaggttaactaatcttaggtcctaagatcatgaaagtaggtacagagatacctaataatgtaggtaacatagttcttaggttaactaat  
aggcctaagatcatgtaagtagatccagagatacctaataatgtaggtaatataggtcctaataaactaacctaggtcctaagatcatgaaagtagatccagagatacctaataatgtaggtcctaataaactaacctaggtccttaggtta  
ctaataataggtcctaagatcatgaaagtagatccagagatacctaataataggtcctaataatgtaggtaatataggtcctaagtaactaatataggtccaaagatacctaataatgtaggtcctaagtaagtaagtaggtccaaagata  
cctaataatgtaggtaacatagttcttaggttaactaatataggtcctaagatcatgaaagtaggtcagagatacctaataatgtacgtcctaataatgtaggtaatataggtcctaagtaactaacgtaggccctaataataggt  
cctaagcctaactaatgtatgtcctataggtacgaataataggtcctaagtaggtgcacacctaataatgtaggtaatataggtcctaagtaactaacgtaggccctaataataggtcctaagcctaactaatgtatgtcctataggtac  
tctagaaatTTTTTgataataatattacattagatgataatcaaaaaacgtaacatgTTTattatatactataaaaacataataatTTTaaattaactatataaaatccaaaatgtcgtatttttattttatagatattgatataataaat  
ttgtcgttattttatgtcatattgtctgtacatagaaatctctgtaaaatTTTaatgtattaaatTTTataataatTTTaaataagTTTTgatataaaatTTTaaatTTTataataaaatTTTaaatTTTataataaaatTTTaaatTTT  
aatataaTTTataaTTTaaatTTTaaatTTTaaatTTTaaatTTTaaatTTTaaatTTTaaatTTTaaatTTTaaatTTTaaatTTTaaatTTTaaatTTTaaatTTTaaatTTTaaatTTTaaatTTTaaatTTTaaatTTTaaatTTTaaat  
aaaatTTTaaatTTTaaatTTTaaatTTTaaatTTTaaatTTTaaatTTTaaatTTTaaatTTTaaatTTTaaatTTTaaatTTTaaatTTTaaatTTTaaatTTTaaatTTTaaatTTTaaatTTTaaatTTTaaatTTTaaatTTTaaat  
acaagatgtgtaaatatacctataaagcgtcctttatatacaataaataatTTTaaatTTTaaatTTTaaatTTTaaatTTTaaatTTTaaatTTTaaatTTTaaatTTTaaatTTTaaatTTTaaatTTTaaatTTTaaatTTTaaatTTTaaat  
atTTTTTTTTTTTTTTTTTTTTTgaatTTTTTTTTTTTTTTTTTgaataaaatataataaaaaatTTTaaatTTTaaatTTTaaatTTTaaatTTTaaatTTTaaatTTTaaatTTTaaatTTTaaatTTTaaatTTTaaatTTTaaatTTTaaat

>R1a2\_01\_10

atactgaagaataaatggaacatcaactagtagtaggacaagacgaagtgcacgtggtgtagtgatcataaaggatataaaaaatTTTTatgaaaactgaaggtgaatatagaaccgttgatggtTTTTggaattatta  
aataaagaaaaagcatgccaagaagttaaagacagtgaaggaggaaaaatTTTtagtgaaaaacacagtggttaataatgataatgaaacaaaaggaaacattttatcgttcggaatattgccaaccatgtccttattgtgga  
gtgagaagacaagggtaaatcaatgggaaaaataaaagtaaaaatgatcaatgcaatataaaaactttataggcctaactcctggcagtgaggtactcctattgaaatccttaaaagtgggaaggagaacagaaattgaaa  
acaaattgaaacgcttctgtcctcaacaaaaatggtagtgtgtggtggcggtagtggtggtggttaacagtgatagtaaggaactttatgatgaatggcaatggtatgaattaaacagctgacgacagatggtcaggagg  
acgatgatgacgaggactatgacaaggatgtaagaactggagggcggattatgtatattggaaaaaaaaaaagaagaagggtgaagccaaatcctaaaatgaacctgatgaaatccaaaagacatacaatgattTTTTTactat  
tgggtggcacaatgtaaaaagattctatacattggagaacaaaaaacttgataagtgataaataacactaataaatcaaaaagcatgtaaaaacagtaataaatgtaataatgattgtggtgttttcaaaaatgggttgatcaa  
aaaaaagaaaaggaaatgggacgcaataaaaacaacaatttcgcaagcaaaaagatattggagatgaaacaaatgtgatcctatcgaactcctgaaggtgtttgcaaatagaattttgaaaggcgattccgaatatggcaaa  
aacgcaccacaagttggaagtgtgtcacaccaagtggttaacacagtgacaccactgtcaaaagtgtgacaccaccgggtgtagtattgtgtgccaccaggagacgacgattatgtcacaccactaacgagattg  
acaggtggtgacgtaccacacagggcgtcacaggcagtgaggtacagacacaagcacgtggttagaacacggataagtcaccaggtagtagtgaggcagcacaaggtgacggcgtgtcgaagaccacaaaag  
gcactactcaaaacttttggtagtctgcagcagttgaaaccttctcctatgggatagataaaaaataaaaagagaaggagaaaaaggaaaaaagaaaacatatgaacaaatataatgaacaaaccgactatgacgatga  
agaaaaagatccacaagaagaattaaaaaaggaaataatcctgatgagtttaagcgtcaaatgtttatagcttaggtgactacaaagataattatacagtggtgatacgggtgaatggtggaatgaggacaaaataaaaa  
agctataaataacttttcaaaaatcgtgaacaatctctagtatacaaccatctcctcgtagtgtcaaaacccctcaactagtgacaaggaccctcaaacctggtggaatgcacacgccctccatctggaatgta  
tggtatgtgctttaaactatgatacaaacagtgccggagagggcaaaaccacaactattacgcaggatcctaattgaaaactgcactttgggacgaaaacggcaaaaaacccctcaaaacaaataccaatgatagtg  
cacaattggtgctagtgggtccaaacccaaccaaagccaaacccactggtggtgacaccccctaccaatTTTgtttacgcccactactccgatacctgaaagatgggggtcaaaatTTTTgaaaaaacgaac

>R1a2\_01\_12

ttaaaggtataaagaaaataaatggtcatgtggtaacgtatgtggtataatgtgtgtaaacgaaaaagttaatggggaaaaaggtagtggggaaaacaatgatcaattatacaattagaggtttggttacacattgggt  
acaaaatTTTTtagacgattataaaaaattagaacaaaatTTTaaagccatgtaggaataatggtgaggtatcctaataatgataaaaagattgtgtaaaaaatgggtgataaaaaaactgaagaatggccaaaaatcagagatc  
ttacttggaaactataaaaagtgatgaggtatacaaaaaatcttggttagaagttttatggagaccttgatacctcctaataatggatcttacaatggttaaggaaaagattcaagaattaaataagttccttaggtcatatgaatgta  
attgcgctgataactcaacaaaaaggtgatacacaagaacacatcgtagaatgtttgcttgaagcctggaagataaaagcaacaagttaaaaaccaaactagtggtaccgactgtcacccctccaccccttgaaga  
tgacgatgaacccttgaagaacagaaataactgtggaacaaccgaacattgtccaacaaaacaccacaaccagagaaagaagacggtgtggaagcagcacaacacagcagaagaacgtcacaacag



ctaatgtaggtaacatagttcttaggftaactaatataggtcctaacatcatgaaagtaggtccaaagatacctaataataggtcctaaggtaatgaaagtagctccagagatacctaataataggtcctaacactaatgtagcttaccctcactcatataggtcttaccacaaaagtagg

>R1a2\_09\_10

aaaatTTTTAAATAGTAATTGATTTTTTTTGTCTAAAATTCTGTATGTTATAACTTTCTCTACTTTTCTACGAGTTGCAAATATTAATATTATTATTTTATAAAAATTTTAACTATTTAAAAAATTAATTATTAAATTATTAATA  
TATAATTACAAAAAAATTTAAATATTATTATAATTATAAAAAAATTCAAAAACAAAATTAAAAAAATAACGAAATGAGAAATATATACTATTACACAATATTGTATTGTTATATATAGCGTTTATC  
TTACAAAATATTATATTATTATTATATATATTTCTGAAATAGTAATAGTATTTACAACTTATCATACTAATTGCATTATTACATATTGAACAAAATATAAATACTATAATTTAATAATTTTGTAAATAATTATATC  
GCATATATATAAACAATAACACAACATTGTATATACTATAAAAAACAAGGAATCATATATATATTTATACTAAATTAGAACATAAAAAGAAATCTTAATATTACTAAAAAATGAGGTATTTCTATAATGAGGATAAT  
AGTACATATGAATACAAAAAATAAAAAAACAACAATAATTAGAAAAAATGAAGAAGCATGAACGAAAAAGAACAATAAATAAAAAATAAATTATTATTATCATGAATCTGGTGATACCATATATT  
ATTTTATATTAGAAAAAGAACTTTAACGATATGTTAAATAAACCTATAGATGCATGGATACTATAAAAATGTGTTTTGAAATGTTTATGGATACTCAAAAATAATTATATAATAAAGTATATACATATCTTTATTG  
TATTTCTATAAAGAATTAATGAATATATTACATTAAGATTCATCTAATATAGTAAATTTAAATAATCTTCTATAAAGCCACAAATTTTACCTATCTCAAATCTCTTAGTTATACAAAACATGATTCATATACCATA  
AAAACCTTATTAGATGGACATTCTAATTATCTATTATTGTGAATTTCTCAGGGTTAACTATTTGATAAATCATTAAATTTATATTATTACATTTTCTCAGTTGAACCTCATTATTTTATATCATCTTCGAAATACAACCTTCTGA  
ACTAAAAGGTATATTATTATTTTCTACAGTATTTTAAATTTAAATTTCACTGTTACTTCTAATCTGAATTTCTACATCTTTAACTCAGATAAATTTCTCTATGGATAAATAATCCCATCTCAGTTTCTACTTTTACATA  
TACTTATACTCTGAAGAATAATAATTATAAAAAAGGTCAATATAGGTATAAAAAATAAATGATATTAAAAAATTCACATTTATAACTTACGTTAATATTACTACTAATACTATTCACAATTGATAACAATTTAAAAATTTG  
TCTAACGGAACAATTTCAAGTGTATTTTCTATTTCTCTCAGAATAATCTCATAAATGGAATTTCTAATCATAATATTATAATTATATTATAAATAAATAATTATTATTATTAAAAATATAAATTGATGATGAA  
TAATGTTTTTATGAATACTATCTGCATTTCTTAAATGTTAATTGTAATTCACAAAAATATACATATATACATATATATAATAAATTTTATAATAATAATAATTTATTATTATTATTATTATTGTTCA  
GGCAAAAATATTATAAATATATTTATAGTTTATAAAGTTAATAATAATGATATATATTTTTCTAAATATTAGTACTCTAATAATATAACATAA

>R1a2\_09\_12

aaacaaaaaaaaaattTTTAAATAGTAATTGATTTTTTTTGTCTAAAATTCTGTATGTTATAACTTTCTCTACTTTTCTACGAGTTGCAAATATTAATATTATTATTTTATAAAAATTTTAACTATTTAAAAAATTAATTAT  
TAAATTATTAAATATAAATTACAAAAAAATTTAAATATTATTATAATTATAAAAAAATTCAAAAACAAAATTAAAAAAATAACGAAATGAGAAATATATACTATTACACAATATTGTATTGTTAT  
ATATAGCGTTTATCTTATACAATATAATTATTATTATTATATATATATTTCTGAAATAGTAATAGTATTTACAACTTATCATACTAATTGCATTATTACATATTGAACAAAATATAAATACTATATTTTAAATAATTGTA  
ATAAATTATATTATCGCATATATATAAACAATAACACAACATTGTATATACTATAAAAAACAAGGAATCATATATATATTTATACTAAATTAGAACATAAAAAGAAATCTTAATATTACTAAAAAATGAGGTATTTCTA  
TAATGAGGATAATAGTACATATGAATACAAAAAATAAAAAAACAACAATAATTAGAAAAAATGAAGAAGCATGAACGAAAAAGAACAATAAATAAAAAATAAATTATTATTATCATGAATCTGG  
TGATACCATATATTATTTATATTAGAAAAAGAACTTTAACGATATGTTAAATAAACCTATAGATGCATGGATACTATAAAAATGTGTTTTGAAATGTTTATGGATACTCAAAAATAATTATATAAATAAATAAAGTATATATT  
ACATATCTTTATTGTATATTCTATAAAGAATTAATGAATATATTACATTAAGATTCATCTAATAGTAATATAAATAAATGTAAGAAATGATCATGATTGTGGTAATATAAATTTACTAGAAATGATAATTGGAAGACTG  
ACTTTCGATATAAATAAATAAAGTTGAAAGGTAACAATGGGGAATTAGGACTTACAAGATGCGTAAGTGAAGTCTTTAAAGAGGATATATAGTATTTAAAGATGTAAGAGACAAAGTGAACAGTGATAAATAAT  
GTGATTTGTTTTATTATTATGTTTTCTAGTTATTTAATATATATATATTTAACTATAATTTTTATAAGTGAATAATAGAATGCAATCATGATTTCTGATTTTATAAGTCTTAAACAATGTTAACTTTATAAGAGAATAGTCTGT  
TTAAAAGCAACATAAAAATTACACAAAACGGGTCTTATTATAAGATGTGTACCCTAAAGTACAATATGAATAATAAATAAATAAATAAATTTTATTATAACATAAAAATTTATATAATTTTCTTAAACAATATGAATATA  
AAGATGTAATAAGAAATTACATAAATAACAAGTTTCTTATATATTATATTACTTAAATTTATATATATAAATAAATAAAGTTATAAATAAGTACTATTATAAATAACTTATAAATAAATAAATTTTAAATTT  
TATATTAATATTATATAACAAAACATTTATAATATTGTGAGAAGTATTATGATTGTATTTATTGTGAATAAACTTTAAGTACTGTAATAATATATTAAATTAATTTTATTATTATTAGACTTAATATTATGATATGATATAT  
ACACATAGTATTAATTTACTTTGTCTAATAAATAAATTTTATATAAATAAATAGATTAATGTTGAAGACATATTATATAATTTTATTATTATTATTATTGTTTAAATAAATAAAGATAA

>R1b2\_10\_08

aaggctacttcgactaacataggtcttacattaactaacataggtcctaacattagtaatgtaggtcttactttcactaacctcttaccttactaacataggtcctaacatgactaacataggtcttaggtgactaaccttag  
ctcttactttactaacaggcttaacttaactaacctcagaccttacttataactataagtcctatttactaacataaggcttacttactgactaacataggtcctaactgactaacataggtcctaactgactaacataggtccta  
aacgtaactaacaggcttaacataactaacgtaaggctcacttcgactaacctaggtcttactttcactaacatagatcttaagttactaacaggcttactttcactcatataagcttatggtaactaacaggctcctaact  
taactaatataggtcataagattactaacctaaagttaaggtaactcaggcttacttactgatataggtcttaagggtactcacaatagcttaagggtactaaccttaagtctaacttaactaatataggtcttactttcac  
aaacatagcccttaacttaactaacaggctcctaacttaactaacataggtccttagcttgactgacataggtcctaactgactaacataggtccttagcttgactgacataggtcctaacttactaacgttggtcttacgactaac
